# Supplementary material
Source: PubMed Central journal article supplement (PMC4061347)
Supplement: 11606_2014_2807_MOESM2_ESM.pdf [file 11606_2014_2807_MOESM2_ESM.pdf]

Table 2. Scale description from *The VA Survey of Depression Care Practices in Primary Care* \*

| Scales                                      | n   | k | Mean  | SD    | $\alpha$ |
|---------------------------------------------|-----|---|-------|-------|----------|
| PCP experience with depression management   | 175 | 6 | 47.86 | 23.72 | 0.83     |
| PCP comfort with depression management      | 183 | 5 | 48.89 | 21.44 | 0.85     |
| PCP difficulty with depression management   | 163 | 6 | 58.18 | 24.98 | 0.73     |
| Collaboration with mental health specialist | 166 | 4 | 46.13 | 40.52 | 0.84     |

PCP = Primary Care Provider

\* Scales were derived for respondents that had completed half or more of the scale items. We constructed scales with scores ranging from 0 – 100, with higher scores indicating a more positive outcome using the following algorithm:  $100 * (\text{sum total} - \# \text{ valid measures}) / ((\text{Maximum Score} * \# \text{ valid measures}) - \# \text{ valid measures})$ .
